# Supplementary material for: Augmented reality for hand function rehabilitation: Assessing perceptions of feasibility and meaningfulness among individuals with cervical spinal cord injury
Source: Research Square preprint supplement (doi:10.21203/rs.3.rs-8683353/v1), 2026-02-04
Supplement: Supplementary file 1 [file 0bbf4ec0b33360e4ae5995e3.docx]

**Supplementary Materials**

**Custom Questionnaire**

1. This technology can provide useful feedback on rehab exercise at home
2. The hand tracking seemed accurate
3. The hand tracking was helpful
4. The target hand posture was clear
5. The target hand posture was helpful
6. It was easy to understand if I was using the correct posture
7. The quality score was easy to understand
8. The quality score was helpful
9. The feedback helped me focus better on my movements
10. The repetition counting was helpful
11. The repetition counting would be helpful to track my performance over time
12. The system would increase my motivation in my exercises
13. The system would improve my compliance with my treatment plans

**System Usability Scale Questionnaire**

1. I think that I would like to use this product frequently
2. I found the product unneseccarily complex
3. I thought the product was easy to use
4. I think that I would need the support of a techincal person to use this product
5. I found the various functions in the product were well integrated
6. I thought there was too much inconsistency in this product
7. I imagine that most people would learn to use this product very quickly
8. I found the product very awkward to use
9. I felt very confident using the product
10. I needed to learn a lot of things before I could get going with this product

**Semi-structured Interview Guide**

1. **Do you think you would be able to use this type of technology at home if it was available to you? Why or why not?**
   1. What obstacles would you anticipate, and would these be small or big problems?
   2. In what ways is this most different from rehab you have done at home in the past?
   3. What are you most unsure about in terms of using this at home without therapist supervision?
2. **How helpful do you think this type of technology would be to your rehabilitation goals?**
   1. Does this address any of the problems or limitations that you have encountered with rehab exercises at home in the past?
   2. How could this make a difference in your recovery?
   3. To what extent do you think this type of technology can provide useful supervision and feedback on rehab exercises at home?
3. **What did you think of the feedback that was provided by the device?**
   1. Did the hand tracking seem accurate?
   2. How was hand tracking helpful?
   3. Was the target hand posture clear?
   4. How was the target hand posture helpful?
   5. How easy was it to understand whether you were using the target posture and what you should be doing differently?
   6. How understandable was the quality score?
   7. Was the quality score helpful?
   8. What did you think about the repetition counting?
4. **What impact would this technology have on your motivation and engagement during rehab exercises at home?**
   1. How does the feedback impact your focus on your movements?
   2. Do you think the repetition counting would help to track your performance over time?
   3. How would this impact your motivation?
   4. Do you think you would comply better with your treatment plans if you had feedback?
5. **What changes would you suggest to the system’s interface to make it easier to use or more useful?**
   1. Would you prefer to see the information presented differently?
   2. What other information would you have liked to see?
6. **Any other thoughts or comments before we close out the interview?**
